## **Identification of key molecules and biological processes in TCF21 treated tumor pericytes**

Guofang Zhao, Donghong Zhang, Mengshan Wang<sup>1</sup>

<sup>1</sup>Shanghai University of Medicine and Health Sciences, Shanghai, China

\*Corresponding author: Mengshan Wang (mengshan@dr.com), Shanghai University of Medicine and Health Sciences, Shanghai, China

## Abstract

Colorectal cancer has become a major public health problem in the US. Transcription factor 21 (TCF21) is reported to be silenced in colorectal cancer tissues. However, the mechanism of TCF21 in tumor pericytes is still unclear. In our study, we aim to identify the key biological processes and signaling pathways by analyzing the RNA-seq data. The GSE200064 was produced by the Illumina NovaSeq 6000 (Homo sapiens). The KEGG and GO analyses showed that MAPK signaling pathway and complement/coagulation cascades are the major changed signaling pathways in the progression of tumor pericytes with overexpression of TCF21. Moreover, we identified several interactive molecules including VEGFA, MMP2, CCL2, COL3A1, COL1A2, CXCL12, ELN, PDGFRB, VWF, and APOE. These findings may benefit the study of colorectal cancer treatment.

## Introduction

Colorectal cancer is one of the most common cancers worldwide<sup>1</sup>. The median age at diagnosis is around 70 years in developed countries. Among them, the highest incidence is found in countries of Europe and North America, whereas incidence is lowest in central Asia and Africa<sup>2</sup>. Currently, the incidence has decreased in the USA, which is probably due to the increased use of sigmoidoscopy and colonoscopy<sup>3</sup>.

Metastasis leads to most cancer death<sup>4</sup>. Unlike primary tumors that can be treated using local surgery or radiation, cancer metastasis is a global issue<sup>5</sup>. In metastatic cancer, for which checkpoint immunotherapy was less effective. Thus, curing cancer metastasis remains a challenge<sup>6</sup>. Though cancer cell metastasis can start early time, most cells cannot colonize distant organs<sup>7</sup>. To form metastasis, cancer cells will undergo a series of steps. Pericytes are related to stabilizing blood vessel structure and permeability in cancer<sup>8</sup>. Pericytes affect tumor metastasis both positively and negatively. Most tumors favor establishing a stable vascular network to nourish tumor cells by maintaining vascular permeability. These aspects require a number of pericytes and depletion of pericytes results in tumor regression<sup>9</sup>.

In this study, we analyzed tumor pericytes with the overexpression of TCF21 by using the RNA-seq data. We determined several DEGs and significant signaling pathways.

We then performed the gene enrichment and created protein-protein interaction (PPI) network to understand the interacting relationships. These genes and biological processes may provide insights into the treatment of colorectal cancer.

## Methods

### Data resources

Gene dataset GSE200064 was obtained from the GEO database (<https://www.ncbi.nlm.nih.gov/geo/>). The data was created by the Illumina NovaSeq 6000 (Homo sapiens) (Jinan University, HuangPu street, GuangZhou 510632, China). The analyzed dataset includes three groups of tumor pericytes and three groups of tumor pericytes with the overexpression of TCF21.

### Data acquisition and processing

The data were organized and conducted by the R package as previously described<sup>10-18</sup>. We used a classical t-test to identify DEGs with  $P < 0.05$  and fold change  $\geq 1.5$  as being statistically significant.

The Kyoto Encyclopedia of Genes and Genomes (KEGG) and Gene Ontology (GO) KEGG and GO analyses were performed by the R package (ClusterProfiler) and Reactome (<https://reactome.org/>).  $P < 0.05$  was considered statistically significant.

### Protein-protein interaction (PPI) networks

The Molecular Complex Detection (MCODE) was used to construct the PPI networks<sup>19-24</sup>. The significant modules were produced from PPI networks and String networks (<https://string-db.org/>). The biological processes analyses were performed by using Reactome, and  $P < 0.05$  was considered significant.

## Results

### Identification of DEGs in tumor pericytes with TCF21 overexpression

To determine the effects of TCF21 on tumor pericytes from patients with colorectal cancer, we analyzed the RNA-seq data of tumor pericytes with the overexpression of

TCF21. A total of 827 genes were identified with a threshold of  $P < 0.05$ . The top up- and down-regulated genes were shown by the heatmap and volcano plot (Figure 1). The top ten DEGs were listed in Table 1.

### **Enrichment analysis of DEGs in tumor pericytes with TCF21 overexpression**

To identify the mechanism of TCF21 in tumor pericytes, we analyzed the enrichment of KEGG and GO items (Figure 2). We identified the top ten KEGG items, including “MAPK signaling pathway”, “Complement and coagulation cascades”, “Protein digestion and absorption”, “Cell adhesion molecules”, “AGE–RAGE signaling pathway in diabetic complications”, “Staphylococcus aureus infection”, “Pertussis”, “TGF–beta signaling pathway”, “Steroid biosynthesis”, and “Terpenoid backbone biosynthesis”. We also identified the top ten biological processes (BP) of GO, including “extracellular matrix organization”, “extracellular structure organization”, “external encapsulating structure organization”, “cell–substrate adhesion”, “transmembrane receptor protein serine/threonine kinase signaling pathway”, “steroid metabolic process”, “urogenital system development”, “kidney development”, “renal system development”, and “sterol biosynthetic process”. We identified the top ten cellular components (CC) of GO, including “collagen–containing extracellular matrix”, “cell–cell junction”, “focal adhesion”, “cell–substrate junction”, “endoplasmic reticulum lumen”, “collagen trimer”, “basement membrane”, “platelet alpha granule”, “platelet alpha granule lumen”, and “complex of collagen trimers”. We identified the top ten molecular functions (MF) of GO, including “extracellular matrix structural constituent”, “glycosaminoglycan binding”, “sulfur compound binding”, “growth factor binding”, “heparin binding”, “integrin binding”, “collagen binding”, “extracellular matrix structural constituent conferring tensile strength”, “extracellular matrix binding”, and “platelet–derived growth factor binding”.

### **PPI network and Reactome analyses**

To explore the potential interactions among the DEGs, we created the PPI network by using 789 nodes and 2693 edges. The combined score  $> 0.2$  was set as a cutoff by using the Cytoscape software. Table 2 showed the top ten genes with the highest scores. The top two significant modules were shown in Figure 3. We further analyzed

the PPI and DEGs with a Reactome map (Figure 4) and identified the top ten biological processes including “Extracellular matrix organization”, “Attenuation phase”, “Activation of gene expression by SREBF (SREBP)”, “HSF1-dependent transactivation”, “Assembly of collagen fibrils and other multimeric structures”, “NGF-stimulated transcription”, “Regulation of cholesterol biosynthesis by SREBP (SREBF)”, “Degradation of the extracellular matrix”, “Collagen formation”, “Nuclear Events (kinase and transcription factor activation)” (Supplemental Table S1).

## Discussion

Transcription factor 21 (TCF21) is one of the basic helix-loop-helix (bHLH) transcription factors that control cell fate and differentiation that plays a critical role in a wide spectrum of biological processes, including organogenesis, proliferation, differentiation as well as invasion and metastasis of cancer cells<sup>25</sup>. Controlled expression and activity of TCF21 provide a changed transcriptional program that affects the progression of cancer<sup>26</sup>.

In our study, we found that the “MAPK signaling pathway” and “Complement and coagulation cascades” are the major changed signaling pathways in tumor pericytes with the overexpression of TCF21. The MAPK pathways are downstream of many growth-factor receptors and overexpression of these receptors is commonly detected in colorectal cancer<sup>27</sup>. The circadian clock is a key regulator for a number of pathological processes including aging, inflammation, metabolism, and cancer<sup>28-38</sup>. Interestingly, MAPKs have important roles in the regulation of the circadian biological clock. In the mammalian suprachiasmatic nucleus (SCN), MAPK pathways can function as inputs to 24h cycles that are consistent with the circadian clock<sup>39</sup>. Jing Zhang et al found that complement and coagulation cascades signaling is related to the soft tissue sarcoma<sup>40</sup>. By creating the PPI network, we also identify the ten key molecules in colorectal cancer cells with the overexpression of TCF21. Haihong Pu et al found that VEGFA is closely associated with breast cancer<sup>41</sup>. Liping Han et al found that MMP2 expression is related to lung cancer and clinical parameters<sup>42</sup>. Su Yin Lim et al found that CCL2-CCR2 signaling is a key process in cancer metastasis<sup>43</sup>. G protein-coupled receptor (GPCR) and regulators of G protein signaling (RGS) family proteins are involved in a variety of

diseases such as cancer, arthritis, metabolic dysfunctions, and aging-related diseases<sup>44-56</sup>. Wendy Kleibeuker et al found that physiological changes of G protein-coupled receptor kinase 2 (GRK2) control CCL2-induced signaling<sup>57</sup>. Lushun Yuan et al found the overexpression of COL3A1 leads to a poor prognosis in bladder cancer<sup>58</sup>. Yifan Yu et al found there are inhibitory effects of COL1A2 on colorectal cancer cell proliferation and migration<sup>59</sup>. Weiqiang Zhou et al found targeting the CXCL12 is of critical importance for tumor immunotherapy<sup>60</sup>. Laura Jamrog et al found that PAX5-ELN leads to multistep B-cell leukemia in mice<sup>61</sup>. Yingchi Zhang et al found that PDGFRB mutation is a characteristic of Ph-like acute lymphoblastic leukemia<sup>62</sup>. Lubor Borsig et al found VWF results in thrombosis during cancer<sup>63</sup>.

To sum up, this study found the significant molecules and signaling pathways during the overexpression of TCF21 in tumor pericytes. The “MAPK signaling pathway” and “Complement and coagulation cascades” are the major changed signaling pathways. Our study may provide novel ideas for the treatment of colorectal cancer.

### **Author Contributions**

Guofang Zhao, Donghong Zhang: Methodology and Writing. Mengshan Wang: Conceptualization, Writing- Reviewing and Editing.

### **Funding**

This work was not supported by any funding.

### **Declarations of interest**

There is no conflict of interest to declare.

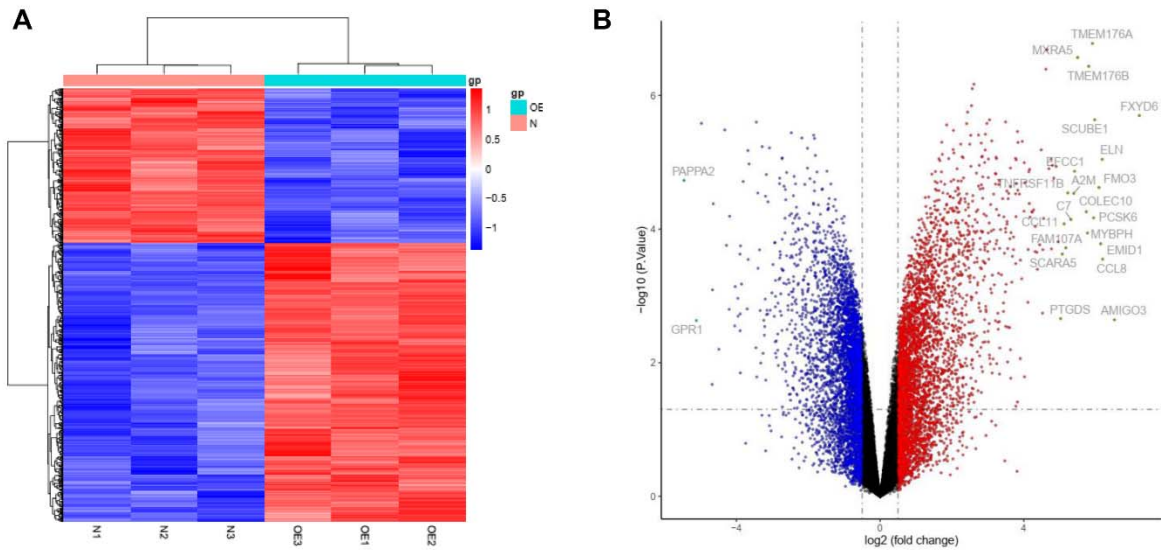

**Figure 1. Heatmap and volcano plot of DEGs in tumor pericytes with TCF21 overexpression**

(A) Significant DEGs ( $P < 0.05$ ) were used to create the heatmap.

(B) Volcano plot for DEGs plot in tumor pericytes with TCF21 overexpression. Note that the most significantly changed genes are highlighted by grey dots.

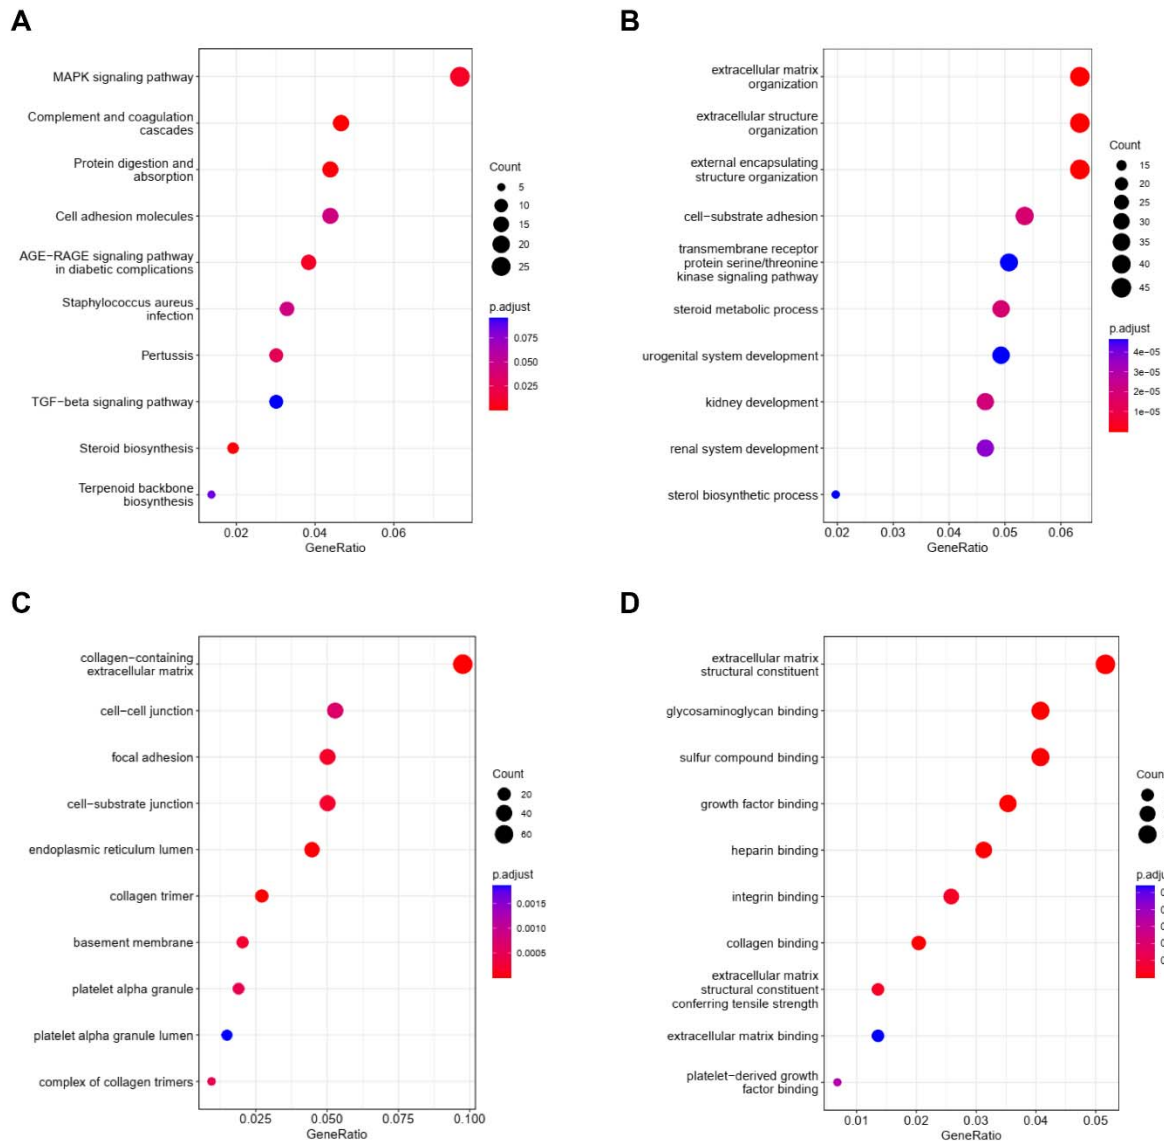

**Figure 2. KEGG and GO analyses of DEGs in tumor pericytes with TCF21 overexpression**

(A) KEGG: Kyoto Encyclopedia of Genes and Genomes, (B) BP: Biological processes, (C) CC: Cellular components, (D) MF: Molecular functions.



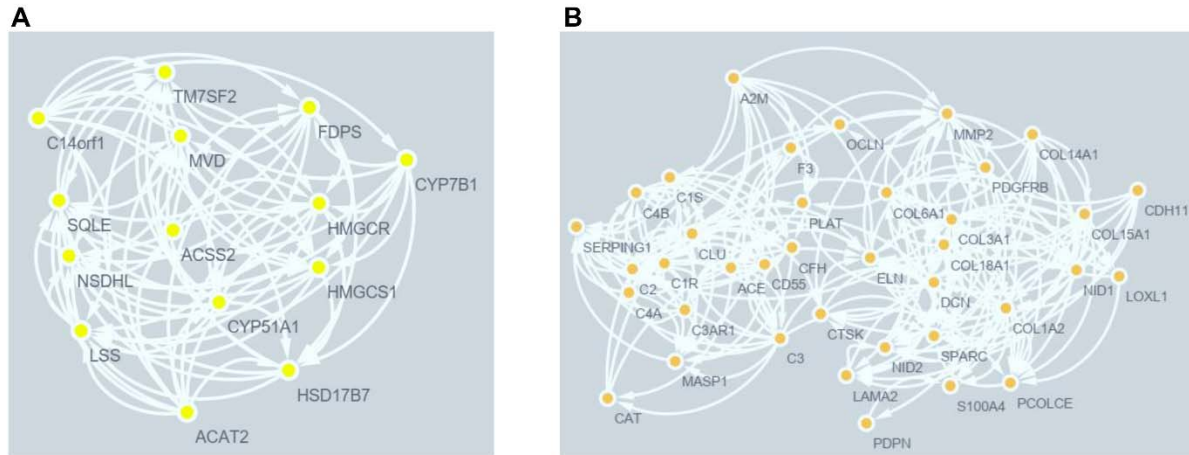

**Figure 3. The PPI network analyses of DEGs in tumor pericytes with TCF21 overexpression**

The cluster (A) and cluster (B) were created by MCODE by using the Cytoscape.

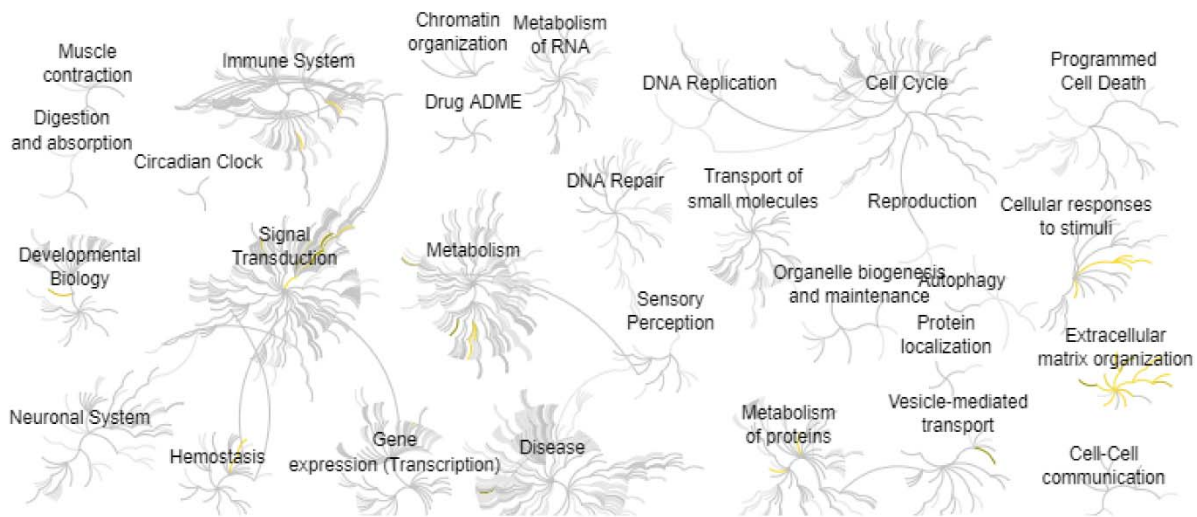

**Figure 4. Reactome map representation of the significant biological processes in tumor pericytes with TCF21 overexpression**

**Table 1**

| <b>Entrez gene</b>                | <b>Gene symbol</b> | <b>Fold-change</b> | <b>Regulation</b> |
|-----------------------------------|--------------------|--------------------|-------------------|
| <b>Top 10 down-regulated DEGs</b> |                    |                    |                   |
| 60676                             | PAPPA2             | -5.45547741        | Down              |
| 55859                             | BEX1               | -4.969309878       | Down              |
| 4803                              | NGF                | -4.643141287       | Down              |
| 84707                             | BEX2               | -4.321426641       | Down              |
| 11174                             | ADAMTS6            | -4.274282108       | Down              |
| 29958                             | DMGDH              | -4.186359809       | Down              |
| 1829                              | DSG2               | -3.895585809       | Down              |
| 1268                              | CNR1               | -3.88357646        | Down              |
| 100506377                         | LINC00973          | -3.809086775       | Down              |
| 5672                              | PSG4               | -3.677349588       | Down              |
| <b>Top 10 up-regulated DEGs</b>   |                    |                    |                   |
| 53826                             | FXYD6              | 7.213133876        | up                |
| 6355                              | CCL8               | 6.192101234        | up                |
| 2006                              | ELN                | 6.178706842        | up                |
| 129080                            | EMID1              | 6.137849006        | up                |
| 2328                              | FMO3               | 6.090854801        | up                |
| 80274                             | SCUBE1             | 5.971817641        | up                |
| 5046                              | PCSK6              | 5.942511642        | up                |
| 55365                             | TMEM176A           | 5.909615823        | up                |
| 28959                             | TMEM176B           | 5.806461231        | up                |
| 4608                              | MYBPH              | 5.770641676        | up                |

**Table 2. Top ten genes demonstrated by connectivity degree in the PPI network**

| <b>Gene symbol</b> | <b>Gene title</b>                            | <b>Degree</b> |
|--------------------|----------------------------------------------|---------------|
| VEGFA              | Vascular endothelial growth factor A         | 96            |
| MMP2               | Matrix metalloproteinase 2                   | 74            |
| CCL2               | C-C motif chemokine ligand 2                 | 56            |
| COL3A1             | Collagen type III alpha 1 chain              | 52            |
| COL1A2             | Collagen type I alpha 2 chain                | 51            |
| CXCL12             | C-X-C motif chemokine ligand 12              | 51            |
| ELN                | Elastin                                      | 50            |
| PDGFRB             | Platelet derived growth factor receptor beta | 49            |
| VWF                | Von Willebrand factor                        | 49            |
| APOE               | Apolipoprotein E                             | 48            |

## References

- [1] Rawla P, Sunkara T, Barsouk A: Epidemiology of colorectal cancer: incidence, mortality, survival, and risk factors. *Prz Gastroenterol* 2019, 14:89-103.
- [2] Sung H, Ferlay J, Siegel RL, Laversanne M, Soerjomataram I, Jemal A, Bray F: Global Cancer Statistics 2020: GLOBOCAN Estimates of Incidence and Mortality Worldwide for 36 Cancers in 185 Countries. *CA Cancer J Clin* 2021, 71:209-49.
- [3] Lin OS, Kozarek RA, Cha JM: Impact of sigmoidoscopy and colonoscopy on colorectal cancer incidence and mortality: an evidence-based review of published prospective and retrospective studies. *Intest Res* 2014, 12:268-74.
- [4] Dillekas H, Rogers MS, Straume O: Are 90% of deaths from cancer caused by metastases? *Cancer Med* 2019, 8:5574-6.
- [5] Tohme S, Simmons RL, Tsung A: Surgery for Cancer: A Trigger for Metastases. *Cancer Res* 2017, 77:1548-52.
- [6] Marin-Acevedo JA, Dholaria B, Soyano AE, Knutson KL, Chumsri S, Lou Y: Next generation of immune checkpoint therapy in cancer: new developments and challenges. *J Hematol Oncol* 2018, 11:39.
- [7] Massague J, Obenauf AC: Metastatic colonization by circulating tumour cells. *Nature* 2016, 529:298-306.
- [8] Bergers G, Song S: The role of pericytes in blood-vessel formation and maintenance. *Neuro Oncol* 2005, 7:452-64.
- [9] Keskin D, Kim J, Cooke VG, Wu CC, Sugimoto H, Gu C, De Palma M, Kalluri R, LeBleu VS: Targeting vascular pericytes in hypoxic tumors increases lung metastasis via angiopoietin-2. *Cell Rep* 2015, 10:1066-81.
- [10] Yu G, Wang LG, Han Y, He QY: clusterProfiler: an R package for comparing biological themes among gene clusters. *OMICS* 2012, 16:284-7.
- [11] Zhang M, Wang J, Gu H: Identification of biological processes and signaling pathways in the stretched nucleus pulposus cells. *bioRxiv* 2021:2021.11.23.469730.
- [12] Gu H, Yuan G: Identification of specific biomarkers and pathways in the synovial tissues of patients with osteoarthritis in comparison to rheumatoid arthritis. *bioRxiv* 2020:2020.10.22.340232.
- [13] Hanming G, Wei W, Gongsheng Y: Identification of potential biomarkers and inhibitors in SARS-CoV-2 infected macaques. *Research Square* 2020.
- [14] Li J, Wang W, Gu H: Identification of biological processes and signaling pathways for the knockout of REV-ERB in mouse brain. *bioRxiv* 2021:2021.11.22.469579.
- [15] Gu H, Yuan G: Identification of potential biomarkers and inhibitors for SARS-CoV-2 infection. *medRxiv* 2020:2020.09.15.20195487.
- [16] Jing W, Hanming G: Identification of biological processes and potential inhibitors for aging skin. *Research Square* 2021.
- [17] Gu H, Wang W, Yuan G: Identification of biomarkers and candidate inhibitors for multiple myeloma. *bioRxiv* 2021:2021.02.25.432847.
- [18] Jing L, Letian W, Hanming G: Identification of driver genes and biological signaling for alcoholic myopathy. *Research Square* 2021.
- [19] Gu H, Yuan G: Identification of potential key genes for SARS-CoV-2 infected human bronchial organoids based on bioinformatics analysis. *bioRxiv* 2020:2020.08.18.256735.
- [20] Hanming G: Identification of the difference of neutrophils in different locations in RA patients. *Research Square* 2021.
- [21] Yuan G: Identification of biomarkers and pathways of mitochondria in sepsis patients. *bioRxiv* 2021:2021.03.29.437586.
- [22] Hanming G, Gongsheng Y: Identification of key genes and pathways in the hPSC-derived lungs infected by the SARS-CoV-2. *Research Square* 2021.

- [23] Hanming G: Identification of biomarkers and signaling pathways during the treatment of multiple myeloma. *Research Square* 2021.
- [24] Gu H, Yuan G: Identification of key genes in SARS-CoV-2 patients on bioinformatics analysis. *bioRxiv* 2020:2020.08.09.243444.
- [25] Ao X, Ding W, Zhang Y, Ding D, Liu Y: TCF21: a critical transcription factor in health and cancer. *J Mol Med (Berl)* 2020, 98:1055-68.
- [26] Lotfi CFP, Passaia BS, Kremer JL: Role of the bHLH transcription factor TCF21 in development and tumorigenesis. *Braz J Med Biol Res* 2021, 54:e10637.
- [27] Fang JY, Richardson BC: The MAPK signalling pathways and colorectal cancer. *Lancet Oncol* 2005, 6:322-7.
- [28] Reppert SM, Weaver DR: Coordination of circadian timing in mammals. *Nature* 2002, 418:935-41.
- [29] Yuan G, Xu L, Cai T, Hua B, Sun N, Yan Z, Lu C, Qian R: Clock mutant promotes osteoarthritis by inhibiting the acetylation of NFkappaB. *Osteoarthritis Cartilage* 2019, 27:922-31.
- [30] Zhu Z, Hua B, Xu L, Yuan G, Li E, Li X, Sun N, Yan Z, Lu C, Qian R: CLOCK promotes 3T3-L1 cell proliferation via Wnt signaling. *IUBMB Life* 2016, 68:557-68.
- [31] Xu L, Cheng Q, Hua B, Cai T, Lin J, Yuan G, Yan Z, Li X, Sun N, Lu C, Qian R: Circadian gene Clock regulates mitochondrial morphology and functions by posttranscriptional way. *bioRxiv* 2018:365452.
- [32] Yuan G, Hua B, Cai T, Xu L, Li E, Huang Y, Sun N, Yan Z, Lu C, Qian R: Clock mediates liver senescence by controlling ER stress. *Aging* 2017, 9:2647-65.
- [33] Zhu Z, Xu L, Cai T, Yuan G, Sun N, Lu C, Qian R: Clock represses preadipocytes adipogenesis via GILZ. *J Cell Physiol* 2018, 233:6028-40.
- [34] Mao SZ, Fan XF, Xue F, Chen R, Chen XY, Yuan GS, Hu LG, Liu SF, Gong YS: Intermedin modulates hypoxic pulmonary vascular remodeling by inhibiting pulmonary artery smooth muscle cell proliferation. *Pulm Pharmacol Ther* 2014, 27:1-9.
- [35] Cai T, Hua B, Luo D, Xu L, Cheng Q, Yuan G, Yan Z, Sun N, Hua L, Lu C: The circadian protein CLOCK regulates cell metabolism via the mitochondrial carrier SLC25A10. *Biochim Biophys Acta Mol Cell Res* 2019, 1866:1310-21.
- [36] Yuan G, Hua B, Yang Y, Xu L, Cai T, Sun N, Yan Z, Lu C, Qian R: The Circadian Gene Clock Regulates Bone Formation Via PDIA3. *J Bone Miner Res* 2017, 32:861-71.
- [37] Fan XF, Wang XR, Yuan GS, Wu DH, Hu LG, Xue F, Gong YS: [Effect of safflower injection on endoplasmic reticulum stress-induced apoptosts in rats with hypoxic pulmonary hypertension]. *Zhongguo Ying Yong Sheng Li Xue Za Zhi* 2012, 28:561-7.
- [38] Zhu Z, Hua B, Shang Z, Yuan G, Xu L, Li E, Li X, Sun N, Yan Z, Qian R, Lu C: Altered Clock and Lipid Metabolism-Related Genes in Atherosclerotic Mice Kept with Abnormal Lighting Condition. *Biomed Res Int* 2016, 2016:5438589.
- [39] Goldsmith CS, Bell-Pedersen D: Diverse roles for MAPK signaling in circadian clocks. *Adv Genet* 2013, 84:1-39.
- [40] Zhang J, Chen M, Zhao Y, Xiong H, Sneh T, Fan Y, Wang J, Zhou X, Gong C: Complement and coagulation cascades pathway correlates with chemosensitivity and overall survival in patients with soft tissue sarcoma. *Eur J Pharmacol* 2020, 879:173121.
- [41] Pu H, Zhang Q, Zhao C, Shi L, Wang Y, Wang J, Zhang M: VEGFA Involves in the Use of Fluvastatin and Zoledronate Against Breast Cancer. *Pathol Oncol Res* 2018, 24:557-65.
- [42] Han L, Sheng B, Zeng Q, Yao W, Jiang Q: Correlation between MMP2 expression in lung cancer tissues and clinical parameters: a retrospective clinical analysis. *BMC Pulm Med* 2020, 20:283.
- [43] Lim SY, Yuzhalin AE, Gordon-Weeks AN, Muschel RJ: Targeting the CCL2-CCR2 signaling axis in cancer metastasis. *Oncotarget* 2016, 7:28697-710.
- [44] Rosenbaum DM, Rasmussen SG, Kobilka BK: The structure and function of G-protein-coupled receptors. *Nature* 2009, 459:356-63.

- [45] Yuan G, Huang Y, Yang ST, Ng A, Yang S: RGS12 inhibits the progression and metastasis of multiple myeloma by driving M1 macrophage polarization and activation in the bone marrow microenvironment. *Cancer Commun (Lond)* 2022, 42:60-4.
- [46] Fu C, Yuan G, Yang ST, Zhang D, Yang S: RGS12 Represses Oral Cancer via the Phosphorylation and SUMOylation of PTEN. *J Dent Res* 2020:22034520972095.
- [47] Yuan G, Yang S, Yang S, Ng A, Oursler MJ: RGS12 is a critical proinflammatory factor in the pathogenesis of inflammatory arthritis via acting in Cox2-RGS12-NF kappa B pathway activation loop. *J Bone Miner Res: WILEY* 111 RIVER ST, HOBOKEN 07030-5774, NJ USA, 2019. pp. 147-.
- [48] Stewart A, Fisher RA: Introduction: G Protein-coupled Receptors and RGS Proteins. *Prog Mol Biol Transl Sci* 2015, 133:1-11.
- [49] Yuan G, Yang S, Liu M, Yang S: RGS12 is required for the maintenance of mitochondrial function during skeletal development. *Cell Discov* 2020, 6:59.
- [50] Yuan G, Yang S, Yang S: Macrophage RGS12 contributes to osteoarthritis pathogenesis through enhancing the ubiquitination. *Genes & Diseases* 2021.
- [51] Xie K, Martemyanov KA: Control of striatal signaling by g protein regulators. *Front Neuroanat* 2011, 5:49.
- [52] Yuan G, Fu C, Yang ST, Yuh DY, Hajishengallis G, Yang S: RGS12 Drives Macrophage Activation and Osteoclastogenesis in Periodontitis. *J Dent Res* 2022, 101:448-57.
- [53] Yuan G, Yang S, Gautam M, Luo W, Yang S: Macrophage regulator of G-protein signaling 12 contributes to inflammatory pain hypersensitivity. *Ann Transl Med* 2021, 9:448.
- [54] Nakagawa T, Minami M, Satoh M: Up-regulation of RGS4 mRNA by opioid receptor agonists in PC12 cells expressing cloned mu- or kappa-opioid receptors. *Eur J Pharmacol* 2001, 433:29-36.
- [55] Yuan G, Yang S, Ng A, Fu C, Oursler MJ, Xing L, Yang S: RGS12 Is a Novel Critical NF-kappaB Activator in Inflammatory Arthritis. *iScience* 2020, 23:101172.
- [56] Yuan G, Yang S: Effect of Regulator of G Protein Signaling Proteins on Bone. *Frontiers in Endocrinology* 2022, 13.
- [57] Kleibeuker W, Jurado-Pueyo M, Murga C, Eijkelkamp N, Mayor F, Jr., Heijnen CJ, Kavelaars A: Physiological changes in GRK2 regulate CCL2-induced signaling to ERK1/2 and Akt but not to MEK1/2 and calcium. *J Neurochem* 2008, 104:979-92.
- [58] Yuan L, Shu B, Chen L, Qian K, Wang Y, Qian G, Zhu Y, Cao X, Xie C, Xiao Y, Wang X: Overexpression of COL3A1 confers a poor prognosis in human bladder cancer identified by co-expression analysis. *Oncotarget* 2017, 8:70508-20.
- [59] Yu Y, Liu D, Liu Z, Li S, Ge Y, Sun W, Liu B: The inhibitory effects of COL1A2 on colorectal cancer cell proliferation, migration, and invasion. *J Cancer* 2018, 9:2953-62.
- [60] Zhou W, Guo S, Liu M, Burow ME, Wang G: Targeting CXCL12/CXCR4 Axis in Tumor Immunotherapy. *Curr Med Chem* 2019, 26:3026-41.
- [61] Jamrog L, Chemin G, Fregona V, Coster L, Pasquet M, Oudinet C, Rouquie N, Prade N, Lagarde S, Cresson C, Hebrard S, Nguyen Huu NS, Bousquet M, Quelen C, Brousset P, Mancini SJ, Delabesse E, Khamlichi AA, Gerby B, Broccardo C: PAX5-ELN oncoprotein promotes multistep B-cell acute lymphoblastic leukemia in mice. *Proc Natl Acad Sci U S A* 2018, 115:10357-62.
- [62] Zhang Y, Gao Y, Zhang H, Zhang J, He F, Hnizda A, Qian M, Liu X, Gocho Y, Pui CH, Cheng T, Wang Q, Yang JJ, Zhu X, Liu X: PDGFRB mutation and tyrosine kinase inhibitor resistance in Ph-like acute lymphoblastic leukemia. *Blood* 2018, 131:2256-61.
- [63] Borsig L: VWF fibers induce thrombosis during cancer. *Blood* 2015, 125:3042-3.
